# Supplementary material
Source: PubMed Central journal article supplement (PMC10293074)

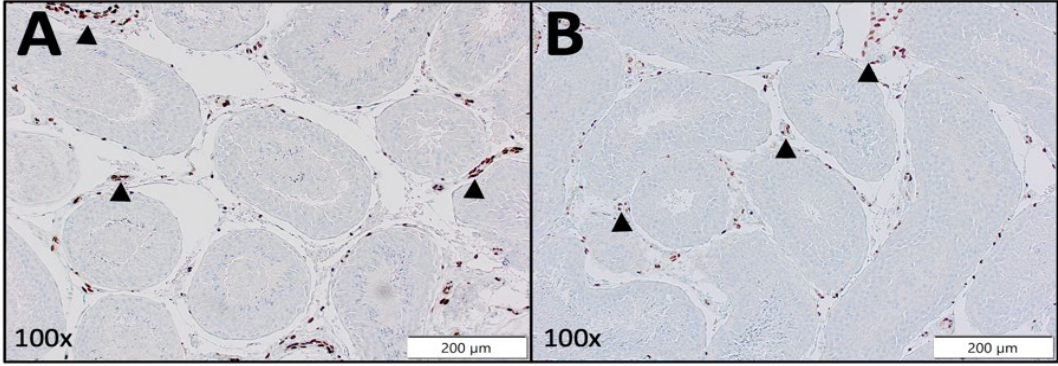

**A**

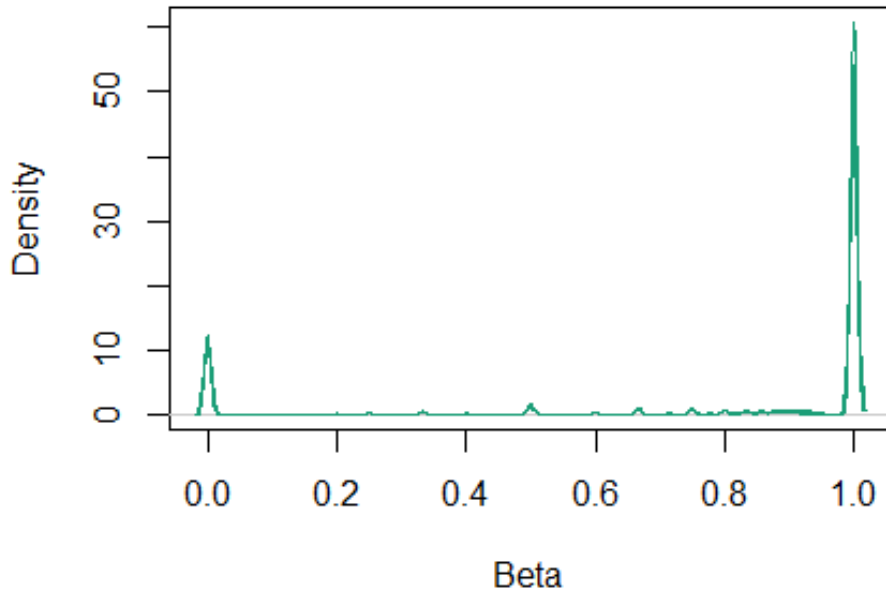

**B**

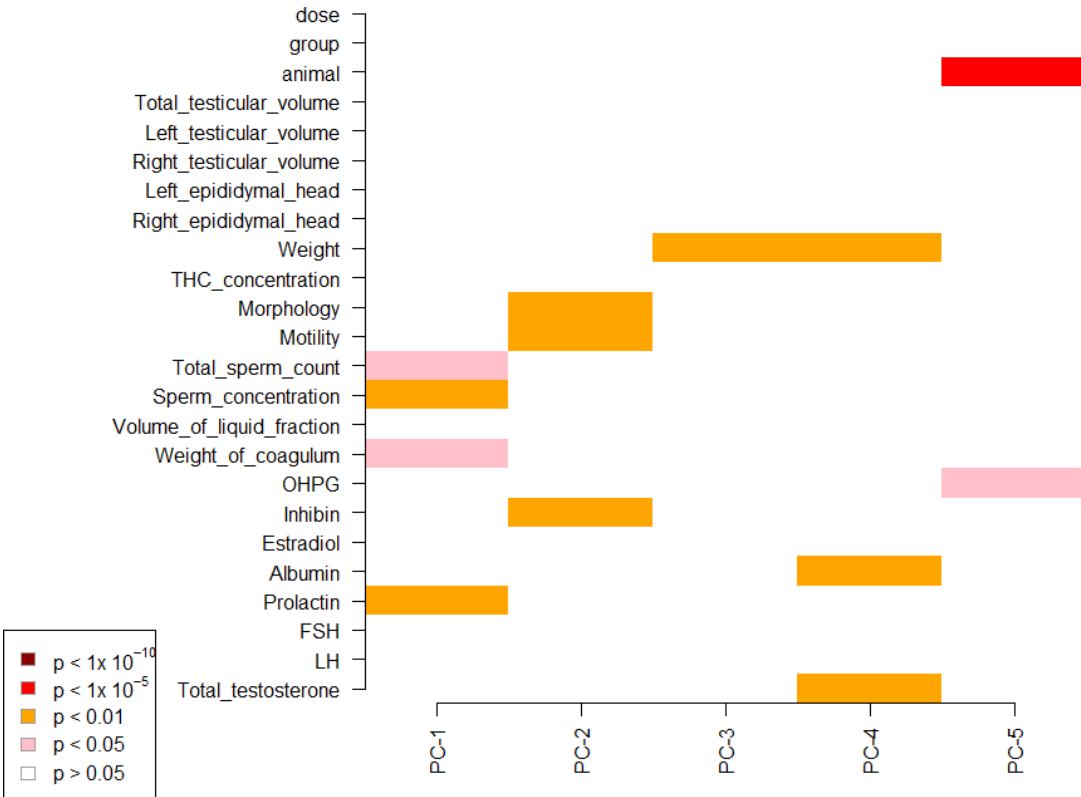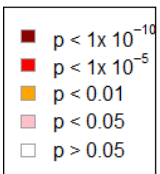

Supplement: NIHMS1879716-supplement-3.pdf [file NIHMS1879716-supplement-3.pdf]
